# Supplementary material for: Scalable fabrication of ultra-fine lithiophilic nanoparticles encapsulated in soft buffered hosts for long-life anode-free Li2S-based cells
Source: Royal Society of Chemistry journal article supplement (doi:10.1039/d3nr03035k), 2023-01-01
Supplement: d3nr03035k1.pdf [file d3nr03035k1.pdf]

## Supporting information

### Scalable fabrication of ultra-fine lithiophilic nanoparticles encapsulated in soft buffered hosts for long-life anode-free Li<sub>2</sub>S-based cells

Bo Zhou<sup>a,d</sup>, Ting Li<sup>a</sup>, Anjun Hu<sup>a,b\*</sup>, Baihai Li<sup>e</sup>, Runjing Li<sup>a</sup>, Chuan Zhao<sup>a</sup>, Nian Chen<sup>c,\*</sup>, Miao He<sup>b</sup>, Jing Liu<sup>a</sup>, Jianping Long<sup>a\*</sup>

<sup>a</sup> College of Materials and Chemistry & Chemical Engineering, Chengdu University of Technology, 1#, Dongsanlu, Erxianqiao, Chengdu 610059, Sichuan, China

<sup>b</sup> State Key Laboratory of Electronic Thin Film and Integrated Devices, University of Electronic Science and Technology of China, Chengdu 610054, China

<sup>c</sup> The First Affiliated Hospital, Department of Medical Cosmetic, Hengyang Medical School, University of South China, Hengyang, Hunan, 421001, China

<sup>d</sup> Zhangjiajie Institute of Aeronautical Engineering, 1#, xueyuan Rd, Wulingshan Avenue, Zhangjiajie 427000, Hunan, China

<sup>e</sup> School of Materials and Energy, University of Electronic Science and Technology of China, Chengdu 610054, China

\* Corresponding author: *anjunhu@feishu.uestc.cn* (Anjun Hu); *chenniangoood@126.com* (Nian Chen); *longjianping@cdut.cn* (Jianping Long)

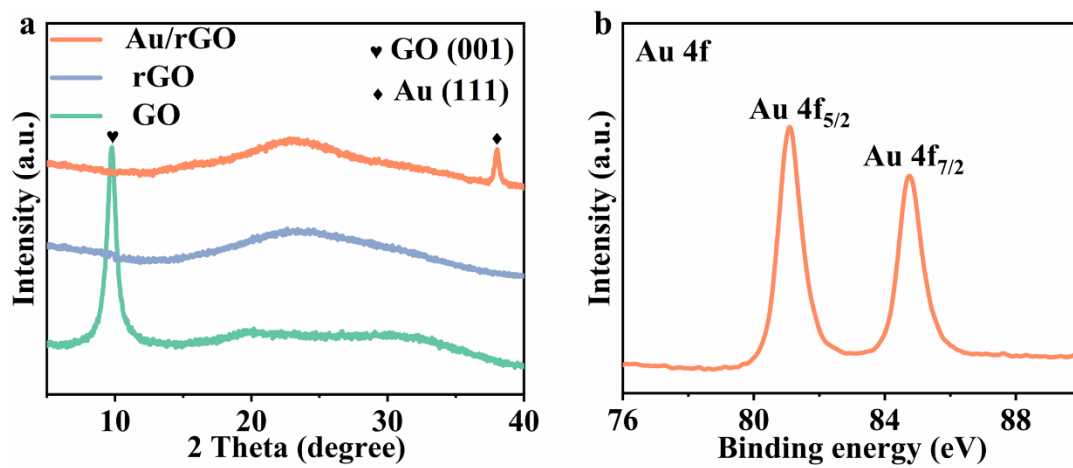

**Fig. S1** (a) XRD of the pristine GO and rGO and Au/rGO film and (b) XPS spectra of Au/rGO film.

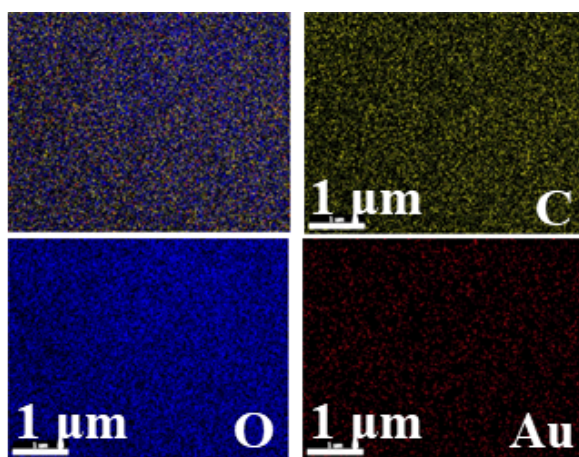

**Fig. S2** EDX mapping of the C, O, and Au elements of Au/rGO film.

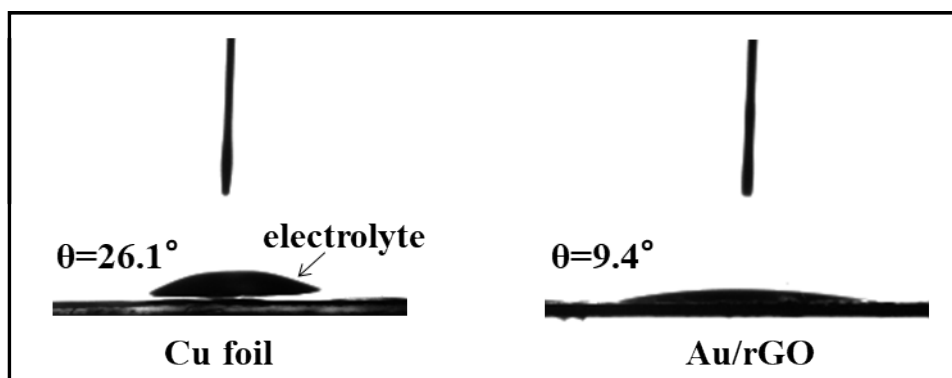

**Fig. S3** Contact angles of electrolyte on pristine Cu foil and Au/rGO film.

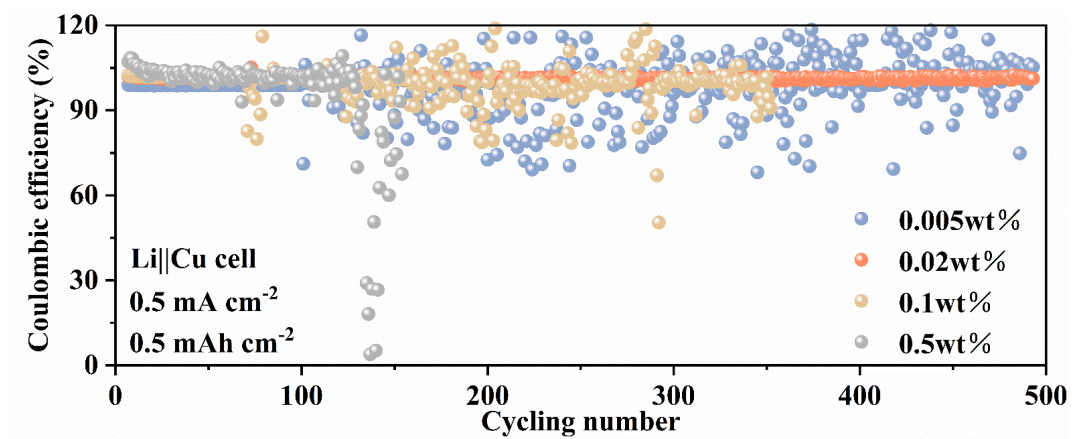

**Fig. S4** Coulombic efficiencies of Au/rGO with different Au contents at 0.5 mA cm<sup>-2</sup>/0.5 mAh cm<sup>-2</sup>.

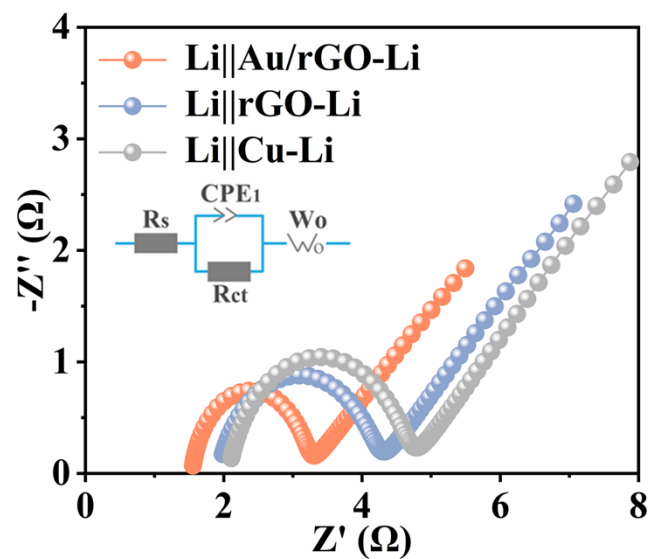

**Fig. S5** Nyquist plots of Li||Cu, Li||rGO, and Li||Au/rGO-Li cells after 50 cycles at  $2 \text{ mA cm}^{-2}/2 \text{ mAh cm}^{-2}$ .

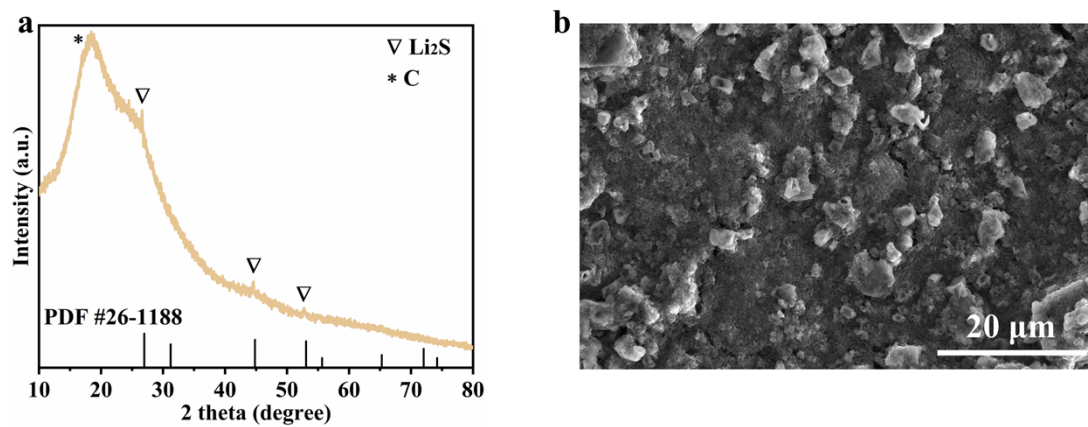

**Fig. S6** (a) XRD pattern of the  $\text{Li}_2\text{S}/\text{C}$  cathode and (b) SEM image.

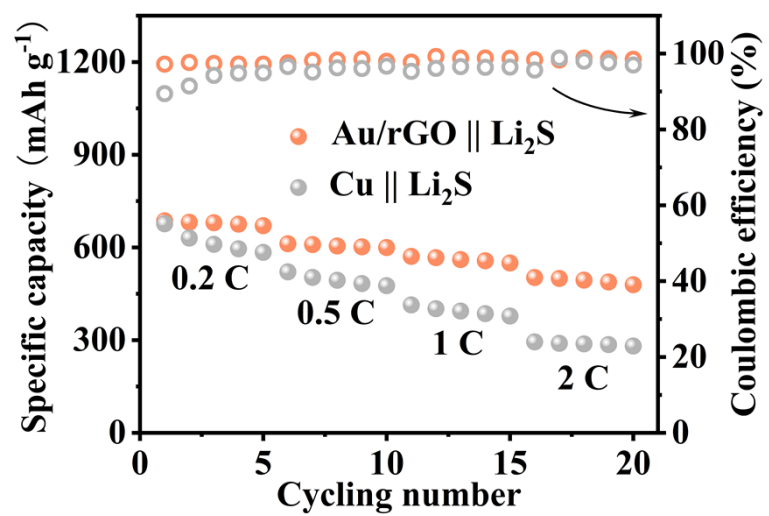

**Figure S7** Rate performance of Au/rGO||Li<sub>2</sub>S and Cu||Li<sub>2</sub>S.



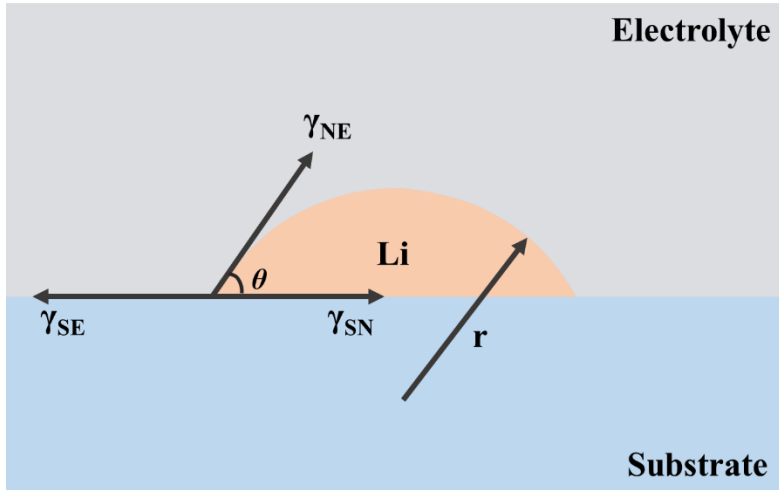

**Fig. S8** Schematic representation of the Li nucleation on substrate based on the classical heterogeneous nucleation model.

**Note 1:** According to classical heterogeneous nucleation theory, the critical nucleation radius ( $r^*$ ) is determined by

$$r^* = 2\gamma_{NE} / \Delta G_V$$

where  $\Delta G_V$  is the free energy change of Li from electrolyte to anode and  $\gamma_{NE}$  is Li/electrolyte interfacial free energy. The  $r^*$  is unaffected by the substrate. However, the volume of nucleated Li to reach  $r^*$  is much smaller than that in homogeneous nucleation, indicating the important role of substrate in regulating Li nucleation.

Li heterogeneous nucleation barrier is related to the binding energy ( $E_b$ ) between the substrate and Li.

$$\Delta G_{het} = S(\theta) \Delta G_{hom}$$

$$S(\theta) = (2 + \cos\theta) (1 - \cos\theta)^2 / 4$$

$$\cos\theta = (\gamma_{SE} - \gamma_{SN}) / \gamma_{NE}$$

Where  $\Delta G_{het}$  and  $\Delta G_{hom}$  are the heterogeneous and homogeneous nucleation barrier, respectively.  $\theta$  is contact angle,  $\gamma_{SE}$ ,  $\gamma_{SN}$ , and  $\gamma_{NE}$  are the interfacial free energy of substrate–electrolyte, substrate–nucleus, and nucleus–electrolyte interfacial free energy, respectively.

When the  $E_b$  between Li and substrate is increased,  $\gamma_{SN}$  is reduced. Therefore,  $\cos\theta$  is increased and  $S(\theta)$  as well as  $\Delta G_{het}$  is decreased. In summary, substrates that can provide a high  $E_b$  toward Li can reduce the Li nucleation barrier as well as the volume of nucleated Li to reach  $r^*$ , favoring uniform Li deposition.<sup>1,2</sup> The  $E_b$  is thus a reasonable descriptor of the lithiophilicity of anodic substrates.

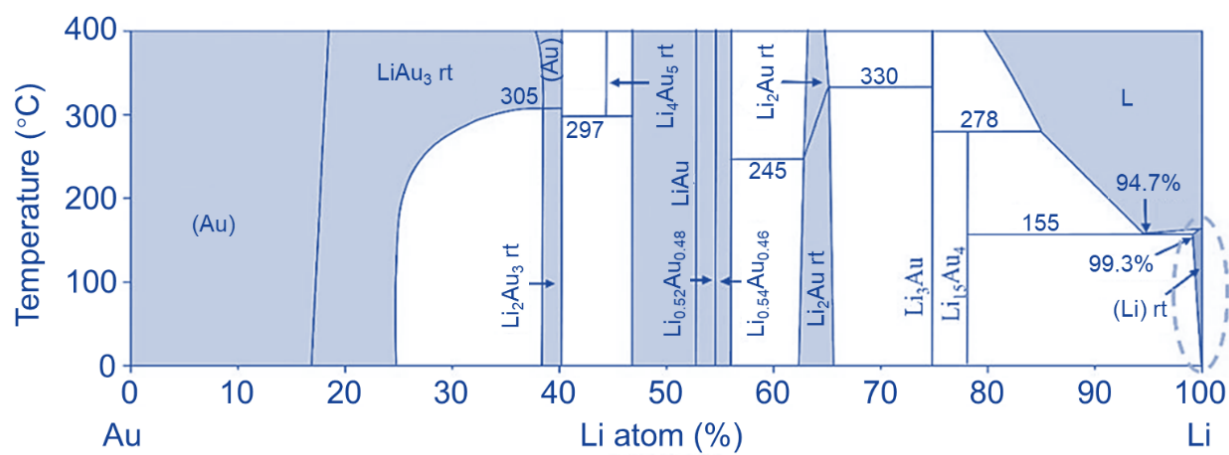

**Fig. S9** Phase diagrams of Li–Au.<sup>3</sup>

**Table S1.** Comparison of main parameters and cycling property for this work with recently reported anode-free full cell.

| Battery system                                                             | Initial discharge capacity (mA h g <sup>-1</sup> ) | Cycle life | Capacity retention | Current density | Reference |
|----------------------------------------------------------------------------|----------------------------------------------------|------------|--------------------|-----------------|-----------|
| Cu  Li <sub>2</sub> S                                                      | 639                                                | 100        | 51.5 %             | 0.1 C           | 4         |
| Cu  LiNi <sub>0.5</sub> Mn <sub>0.3</sub> Co <sub>0.2</sub> O <sub>2</sub> | 162                                                | 100        | 42 %               | 0.1 C           | 5         |
| Cu@PEO  LiFePO <sub>4</sub>                                                | 127                                                | 100        | 49.6 %             | 0.2 C           | 6         |
| 3D-Cu  Li <sub>2</sub> S                                                   | 588.4                                              | 180        | 59.34 %            | 0.1 C           | 7         |
| MLG  LiFePO <sub>4</sub>                                                   | 151                                                | 100        | 61 %               | 0.1 C           | 8         |
| 15Ph5  LiFePO <sub>4</sub>                                                 | 106.9                                              | 100        | 63 %               | 0.2 C           | 9         |
| Au/rGO  Li <sub>2</sub> S                                                  | 673.1                                              | 200        | 63.3 %             | 0.2 C           | This work |

**Table S2.** The calculation of the energy density of the Au/rGO||Li<sub>2</sub>S anode-free full cell in our work.

| Components                                            | value   |
|-------------------------------------------------------|---------|
| Li <sub>2</sub> S mass loading (mg cm <sup>-2</sup> ) | 2.0     |
| Area of the electrode film (cm <sup>2</sup> )         | 1.131   |
| The mass of Li <sub>2</sub> S (mg)                    | 2.262   |
| The mass of carbon black (mg)                         | 0.97    |
| The mass of PVDF (mg)                                 | 0.36    |
| The mass of current collector (cathode, mg)           | 4.95    |
| The mass of the whole cathode (mg)                    | 8.542   |
| The mass of Au (mg)                                   | 0.00006 |
| The mass of rGO current collector (mg)                | 0.30531 |
| The mass of the whole anode (mg)                      | 0.3054  |
| Total mass (mg)                                       | 8.8474  |
| The initial discharge capacity (mAh g <sup>-1</sup> ) | 673.1   |

According table S2, the gravimetric energy density can be calculated as below. The mass of electrolyte and packing materials are not included.<sup>10</sup>

$$\begin{aligned} M_{Gravimetric\ energy\ density} &= \frac{E \times Q_{Li_2S} \times m_{Li_2S}}{m_{total}} \\ &= \frac{2.1 \times 673.1 \times 3.232}{8.8474} \text{ Wh kg}^{-1} \\ &\approx 516.4 \text{ Wh kg}^{-1} \end{aligned}$$

E is the average discharge voltage of the full cell,  $Q_{Li_2S}$  is the theoretical gravimetric specific capacities of Li<sub>2</sub>S cathode,  $m_{Li_2S}$  is the mass of Li<sub>2</sub>S cathode.

**Table S3.** The material cost of various components<sup>10</sup>.

| Category           | Price<br>(\$ g <sup>-1</sup> ) | Unit area<br>consumption<br>(mg cm <sup>-2</sup> ) | Unit area cost<br>(\$ cm <sup>-2</sup> ) |
|--------------------|--------------------------------|----------------------------------------------------|------------------------------------------|
| Li <sub>2</sub> S* | 30.02                          | 2                                                  | 6.0×10 <sup>-2</sup>                     |
| Au**               | 47                             | 0.000054                                           | 2.54×10 <sup>-6</sup>                    |
| rGO*               | 79.81                          | 0.27                                               | 2.15×10 <sup>-2</sup>                    |
| Al foil***         | /                              | /                                                  | 0.16                                     |
| Carbon black****   | 0.07                           | 0.857                                              | 0.6×10 <sup>-4</sup>                     |
| PVDF****           | 0.215                          | 0.318                                              | 0.68×10 <sup>-4</sup>                    |

\* The price of rGO and Li<sub>2</sub>S are from Shanghai Aladdin Biochemical Technology Co., Ltd.

\*\* The prices of Au are from the website of <https://www.ccmn.cn>.

\*\*\* The prices of Al foil are from Shenzhen Kejing Microelectronics Technology Co., Ltd.

\*\*\*\* Suzhou Duoduo Chemical Technology Co., Ltd.

The theoretical cost of the Au@rGO||Li<sub>2</sub>S anode-free full

$$\text{cell} = 1.131 \times (6.0 \times 10^{-2} + 2.54 \times 10^{-6} + 2.15 \times 10^{-2} + 0.16 + 0.6 \times 10^{-4} + 0.68 \times 10^{-4}) / (673.1 \times 10^{-3}) = 0.41 \text{ \$ Ah}^{-1}.$$

- 1 H. Zhang, X. Liao, Y. Guan, Y. Xiang, M. Li, W. Zhang, X. Zhu, H. Ming, L. Lu, J. Qiu, Y. Huang, G. Cao, Y. Yang, L. Mai, Y. Zhao, H. Zhang, *Nat. Commun.*, 2018, **9**, 3729. <https://doi.org/10.1038/s41467-018-06126-z>.
- 2 Y.-X. Yao, X.-Q. Zhang, B.-Q. Li, C. Yan, P.-Y. Chen, J.-Q. Huang, Q. Zhang, *InfoMat*, 2020, **2**, 379-388. <https://doi.org/10.1002/inf2.12046>.
- 3 K. Yan, Z. Lu, H.-W. Lee, F. Xiong, P.-C. Hsu, Y. Li, J. Zhao, S. Chu, Y. Cui, *Nat. Energy*, 2016, **1**, 16010. <https://doi.org/10.1038/nenergy.2016.10>.
- 4 S. Nanda, A. Gupta, A. Manthiram, *Adv. Energy Mater.*, 2018, **8**, 1801556. <https://doi.org/10.1002/aenm.201801556>.
- 5 A. J. Louli, M. Genovese, R. Weber, S. G. Hames, E. R. Logan, J. R. Dahn, *J. Electrochem. Soc.*, 2019, **166**, A1291-A1299. <https://doi.org/10.1149/2.0091908jes>.
- 6 A. A. Assegie, J. H. Cheng, L. M. Kuo, W. N. Su, B. J. Hwang, *Nanoscale*, 2018, **10**, 6125-6138. <https://doi.org/10.1039/C7NR09058G>.
- 7 H. Cheng, C. Gao, N. Cai, M. Wang, *Chem. Commun.*, 2021, **57**, 3708-3711. <https://doi.org/10.1039/d1cc00006c>.
- 8 A. A. Assegie, C.-C. Chung, M.-C. Tsai, W.-N. Su, C.-W. Chen, B.-J. Hwang, *Nanoscale*, 2019, **11**, 2710-2720. <https://doi.org/10.1039/C8NR06980H>.
- 9 J. Lee, Y.-G. Cho, D. Gu, S. Kim, *ACS Appl. Mater. Interfaces*, 2022, **14**, 15080-15089. <https://doi.org/10.1021/acsami.1c21183>.
- 10 J. Chen, J. Xiang, X. Chen, L. Yuan, Z. Li, Y. Huang, *Energy Storage Mater.*, 2020, **30**, 179-186. <https://doi.org/10.1016/j.ensm.2020.05.009>.
